1  
2  
3  
4  
5  
6  
7  
8  
9  
10  
11  
12  
13  
14  
15  
16  
17  
18  
19  
20  
21  
22  
23  
24  
25  
26  
27  
28

**A Cre-dependent reporter mouse for quantitative real-time imaging of Protein Kinase A activity dynamics**

Elizabeth I. Tilden<sup>1,2</sup>, Aditi Maduskar<sup>1</sup>, Anna Oldenborg<sup>1</sup>, Bernardo L. Sabatini<sup>3</sup>, Yao Chen<sup>1,\*</sup>

1. Department of Neuroscience, Washington University in St. Louis, St. Louis, MO, United States
2. Ph. D. Program in Neuroscience, Washington University in St. Louis
3. Howard Hughes Medical Institute, Department of Neurobiology, Harvard Medical School, Boston, MA, United States

\* Corresponding author. Email: [yaochen@wustl.edu](mailto:yaochen@wustl.edu)

29 **Abstract**

30 Intracellular signaling dynamics play a crucial role in cell function. Protein kinase A (PKA) is a  
31 key signaling molecule that has diverse functions, from regulating metabolism and brain activity  
32 to guiding development and cancer progression. We previously developed an optical reporter,  
33 FLIM-AKAR, that allows for quantitative imaging of PKA activity via fluorescence lifetime  
34 imaging microscopy and photometry. However, using viral infection or electroporation for the  
35 delivery of FLIM-AKAR is invasive, cannot easily target sparse or hard-to-transfect/infect cell  
36 types, and results in variable expression. Here, we developed a reporter mouse, *FL-AK*, which  
37 expresses FLIM-AKAR in a *Cre*-dependent manner from the *ROSA26* locus. *FL-AK* provides  
38 robust and consistent expression of FLIM-AKAR over time. Functionally, the mouse line reports  
39 an increase in PKA activity in response to activation of both  $G_{\alpha s}$  and  $G_{\alpha q}$ -coupled receptors in  
40 brain slices. *In vivo*, *FL-AK* reports PKA phosphorylation in response to neuromodulator  
41 receptor activation. Thus, *FL-AK* provides a quantitative, robust, and flexible method to reveal  
42 the dynamics of PKA activity in diverse cell types.

43

## 44 **Introduction**

45 Multiple studies in recent years have shown that cells can encode and decode information  
46 through the spatial and temporal dynamics of intracellular signals<sup>1</sup>. Transient, sustained, or  
47 oscillatory patterns of the same intracellular signal, for example, can result in distinct outcomes  
48 including proliferation, differentiation, cell death, or cell cycle arrests<sup>2-8</sup>. The importance of  
49 signal dynamics has been demonstrated in cell biology, development, immunology, cancer  
50 biology, and neuroscience.

51 Protein phosphorylation is a widely used signal transduction process and is catalyzed by protein  
52 kinases. Protein kinase A (PKA) is a ubiquitous and functionally important protein kinase. In the  
53 nervous system, it integrates inputs from many extracellular signals and has profound effects on  
54 neuronal excitability, synaptic transmission, synaptic plasticity, and learning and memory<sup>9-26</sup>. In  
55 cancer biology, it controls oncogenic signaling and regulates mesenchymal-to-epithelial  
56 transition<sup>27,28</sup>. Furthermore, PKA activity is critical in multiple processes in metabolism,  
57 development, vascular biology, pancreatic, and kidney functions<sup>29-33</sup>. Moreover, the dynamics of  
58 PKA activity are critical for its functions. On a cellular level, distinct PKA regulation by  
59 different receptors in different cell types results in cell-type specific and learning stage-specific  
60 contributions to learning<sup>13</sup>. On a subcellular level, PKA activation in different compartments or  
61 microdomains regulates distinct functions such as differential modulation of receptors and  
62 channels<sup>34</sup>. Temporally, different duration of PKA phosphorylation can lead to distinct modes of  
63 temporal integration, resulting in control of mating duration<sup>24,35</sup>. Thus, being able to watch PKA  
64 activity with cellular resolution in real time is critical to understand PKA function.

65 Because of the importance of PKA dynamics, multiple optical reporters of PKA activity have  
66 been made<sup>36-41</sup>. Together, these sensors have revealed the importance of the PKA dynamics that  
67 underlie lipid metabolism, cancer biology, learning, movement, and response to chemicals in the  
68 brain that modulate the nervous system (neuromodulators)<sup>10,13,25-27,32,35-38,42</sup>. They are all based on  
69 an original ratiometric Förster Resonance Energy Transfer (FRET) reporter developed by Jin  
70 Zhang and Roger Tsien<sup>36</sup>, which works successfully in cells but has limitation in thick brain  
71 tissue, especially due to the challenge of using FRET with two photon (2p) microscopy. To make  
72 the original sensor compatible with 2p imaging in thick brain tissue and *in vivo*, we converted it  
73 into one that is compatible with two photon fluorescence lifetime imaging microscopy  
74 (2pFLIM). We named it FLIM-compatible A Kinase Activity Reporter (FLIM-AKAR)<sup>39</sup>. FLIM,  
75 which measures the time it takes between excitation and emission of light from the donor  
76 fluorophore, offers excellent signal to noise ratio and is especially important for compatibility  
77 with 2p microscopy<sup>39,43,44</sup>.

78 Previously, PKA activity sensors were delivered *in vivo* via viral infection or *in utero*  
79 electroporation (IUE) of DNA. Although these methods are effective in sensor delivery, they  
80 result in expression level variation from cell to cell, and from mouse to mouse. Furthermore,  
81 region-specific delivery of sensors via IUE or virus makes it hard to target sparsely distributed  
82 cell types. Finally, the surgeries required involve additional experimental time, are invasive, and  
83 cause inflammation afterwards. For other sensors, such as the calcium sensor GCaMP, the  
84 development of knock-in mouse lines have benefited the scientific community tremendously  
85 with consistent expression, ease of targeting to rare cell types, and removal of the need for  
86 surgeries<sup>45-47</sup>.

87 To overcome the limitations of sensor delivery with IUE and virus, we constructed a knock-in  
88 reporter mouse of PKA activity that expresses FLIM-AKAR in a *Cre* recombinase-dependent  
89 way. We find robust and consistent expression of FLIM-AKAR in multiple cell types in the  
90 brain. We demonstrate successful reporting of PKA activity in response to neuromodulator G  
91 protein-coupled receptor (GPCR) activation in specific cell types in brain slices and in freely  
92 moving mice. Thus, the PKA activity reporter mouse line can be deployed to reveal PKA  
93 dynamics in genetically identifiable cell types in the brain and beyond.

## 94 **Results**

95 To characterize the utility of the *FLIM-AKAR<sup>lox/flox</sup>* (*FL-AK*) knock-in mouse line, we crossed *FL-*  
96 *AK* mice with *Cre* lines to express FLIM-AKAR in selected cell populations in the brain. We  
97 labelled Type 1 dopamine receptor (D1R) expressing spiny projection neurons (D1R-SPNs) by  
98 crossing *FL-AK* with *Tg(Drd1a-cre)* mice<sup>48-50</sup>. We labelled excitatory neurons (and a small  
99 subset of glia) in the neocortex and hippocampus by crossing *FL-AK* mice with *Emx1<sup>IREScree</sup>*  
100 mice<sup>51</sup>. We then imaged FLIM-AKAR responses to neuromodulator receptor activation in brain  
101 slices and in freely behaving mice.

### 102 ***FLIM-AKAR<sup>lox/flox</sup>* mice show robust and steady expression levels over time**

103 To achieve consistent expression of the PKA activity reporter FLIM-AKAR, we generated a  
104 knock-in mouse of *Cre* recombinase-dependent *FLIM-AKAR* in the *ROSA26* locus (Fig. 1a).  
105 Here, the *FLIM-AKAR* gene is under the control of the cytomegalovirus early enhancer/chicken  
106  $\beta$ -actin (*CAG*) promoter. The addition of a *lox-stop-lox* cassette makes the reporter gene *Cre-*  
107 dependent, allowing for selective expression of FLIM-AKAR in specific cell types. FLIM-  
108 AKAR is a fluorescence lifetime-based, genetically encoded optical reporter of PKA activity<sup>39</sup>. It  
109 consists of a donor fluorophore of monomeric enhanced green fluorescent protein (meGFP) and  
110 an acceptor fluorophore of dark yellow fluorescent protein (sREACH). When PKA  
111 phosphorylates the substrate consensus region within the linker region, the resulting  
112 phosphopeptide binds to the FHA1 phosphopeptide binding domain that is also in the linker  
113 region, thus bringing the donor and acceptor fluorophores closer together. This results in  
114 increased FRET and decreased fluorescence lifetime. This conformational change can also be  
115 reversed by phosphatases, which release the phosphopeptide from its binding domain through  
116 dephosphorylation (Fig. 1b). Thus, FLIM-AKAR is a phosphorylation substrate reporter that  
117 reports the balance between PKA and phosphatase. After crossing *FL-AK* mice to *Cre* lines to  
118 express FLIM-AKAR in selected cell types, we assessed FLIM-AKAR expression and functional  
119 responses with 2pFLIM.

120 *Emx1<sup>IREScree</sup>;FLIM-AKAR<sup>lox/flox</sup>* mice showed robust FLIM-AKAR expression across the cortex and  
121 in the hippocampus (Fig. 1c,d). In contrast, in *Cre<sup>-/-</sup>;FLIM-AKAR<sup>lox/flox</sup>* animals, there was very  
122 little green signal, demonstrating the *Cre* dependence of FLIM-AKAR expression (Fig. 1c,d). To  
123 observe cellular-level FLIM-AKAR expression across cell types, we collected both fluorescence  
124 intensity and lifetime data from acute brain slices using 2pFLIM. We observed reliable FLIM-  
125 AKAR expression throughout the cell in D1R-SPNs in *FL-AK* reporter mice crossed with the  
126 *Tg(Drd1-cre)* line<sup>48-50</sup> and in CA1 pyramidal neurons of *FL-AK* reporter mice crossed with the  
127 *Emx1<sup>IREScree</sup>* line<sup>51</sup> (Fig. 1e). Interestingly, these neurons also displayed heterogeneity of  
128 fluorescence lifetime, indicating different PKA phosphorylation states between subcellular  
129 compartments and between cells (Fig. 1f)

130 In order to determine whether *FL-AK* reporter mice show stable expression of FLIM-AKAR over  
131 time, we performed 2p imaging of acute striatal slices from *Tg(Drd1a-Cre); FLIM-AKAR<sup>fllox/fllox</sup>*  
132 mice across a range of ages (Fig. 2). In both the nuclear and cytoplasmic compartments,  
133 expression level of FLIM-AKAR was not significantly different between mice aged 0-6 weeks (n  
134 = 14 cells from 4 mice) and mice aged 7-14 weeks (n = 16 cells from 6 mice) (Fig. 2c,d),  
135 nucleus: p=0.755, cytoplasm: p= 0.787; 2-tailed Mann-Whitney U test). Thus, *FL-AK* reporter  
136 mice show robust and consistent expression and can be used to determine PKA activity across  
137 ages.

### 138 ***FL-AK* mice report PKA activity in response to neuromodulator receptor activation in** 139 **acute slices**

140 PKA is activated by  $G_{\alpha s}$ -coupled receptors, one of the most well-known being the D1R.  
141 Signaling through D1Rs stimulates adenylate cyclase activity, which produces cyclic AMP  
142 (cAMP), a second messenger that can activate PKA<sup>52,53</sup>. D1Rs are found on various cell types,  
143 and play major functional roles in spiny projection neurons (SPNs) of the striatum<sup>11,18,54-56</sup>. SKF  
144 81297 is a selective D1/D5 agonist that increases signaling through the cAMP/PKA pathway<sup>54,56</sup>.  
145 In order to assess whether *FL-AK* reporter mice can respond to D1 activation, we imaged FLIM-  
146 AKAR in D1R-SPNs of acute striatal slices from *Tg(Drd1a-Cre); FLIM-AKAR<sup>flf</sup>* mice. D1R-  
147 SPNs showed lifetime decreases in response to the D1/D5 agonist SKF 81297 (1  $\mu$ M), first in the  
148 cytoplasm and then in the nucleus, which is consistent with D1R activation beginning in the  
149 plasma membrane (Fig. 3a-c; nucleus: p = 1.30e-8, cytoplasm: p = 2.27e-12, Wilcoxon signed  
150 rank test). These results indicate that *FL-AK* reporter mice can report PKA activity increase in  
151 response to activation of a classical  $G_{\alpha s}$ -coupled receptor.

152 We subsequently determined whether *FL-AK* reporter mice can report elevated PKA  
153 phosphorylation in response to  $G_{\alpha q}$ -coupled receptor signaling. Although  $G_{\alpha q}$  signaling was not  
154 classically linked to PKA, we recently discovered that endogenous  $G_{\alpha q}$ -coupled receptors, such  
155 as muscarinic acetylcholine receptors (mAChRs), do activate PKA<sup>10</sup>. Here, with  
156 *Emx1<sup>IREScre</sup>; FLIM-AKAR<sup>fllox/fllox</sup>* mice, we assessed whether reporter mice expressing FLIM-AKAR  
157 in CA1 pyramidal neurons showed functional responses to muscarinic activation. Consistent with  
158 our previous data with IUE of the *FLIM-AKAR<sup>10</sup>*, we found a fluorescence lifetime decrease of  
159 FLIM-AKAR in both the nuclear and cytoplasmic compartments of CA1 pyramidal neurons in  
160 response to mAChR activation (Fig. 4a-c; nucleus: p = 0.0069, cytoplasm: p = 0.00066,  
161 Wilcoxon signed rank test; baseline vs muscarine). Following muscarinic receptor activation, we  
162 directly activated adenylate cyclase through the application of forskolin (FSK). In response, we  
163 saw an additional decrease in fluorescence lifetime, demonstrating a further increase in PKA  
164 activity (Fig. 4a-c; nucleus: p = 2.66e-6, cytoplasm: p = 9.31e-10, Wilcoxon signed rank test;  
165 muscarine vs muscarine + forskolin). These data indicate that *FL-AK* reporter mice can be used  
166 to detect changes in intracellular PKA activity in response to diverse neuromodulator inputs.

### 167 ***FL-AK* mice respond to dopamine receptor activation *in vivo***

168 We examined whether *FL-AK* reporter mice are sensitive enough to detect PKA activation *in*  
169 *vivo*. We implanted an optical fiber into the dorsal striatum of *Tg(Drd1a-cre); FLIM-AKAR<sup>fllox/fllox</sup>*  
170 mice, and monitored PKA activity in freely moving mice with a custom fluorescence lifetime  
171 photometry (FLiP) setup<sup>57</sup> (Fig. 5a). In response to intraperitoneal (IP) injection of the D1/D5  
172 agonist SKF81297, but not saline, FLIM-AKAR in D1R-SPNs of the reporter mice showed a

173 fluorescence lifetime decrease (Fig. 5b). These are consistent with previous reports where we  
174 delivered FLIM-AKAR with adeno-associated virus<sup>57</sup>. These results indicate *FL-AK* reporter  
175 mice can report PKA activity *in vivo*.

## 176 Discussion

177 The FLIM-AKAR PKA activity reporter is a powerful optical tool that has the potential to  
178 unlock our understanding of the intracellular dynamics of PKA. *FL-AK* reporter mice facilitate  
179 the use of FLIM-AKAR in genetically defined cell populations specified by the *Cre* line with  
180 which the mice are crossed. Here, we show that *FL-AK<sup>flox/flox</sup>* mice exhibit robust *Cre*-dependent  
181 expression of FLIM-AKAR that is stable over time. They also show reliable functional responses  
182 to diverse neuromodulator signals including activation of both G<sub>αs</sub>- and G<sub>αq</sub>-coupled receptors.  
183 Furthermore, *FL-AK* mice demonstrate a sufficient dynamic range to distinguish between  
184 different PKA phosphorylation states *in vivo*.

185 *FL-AK* mice offer several advantages over surgical methods to deliver the reporter. First, the *FL-*  
186 *AK* mouse line generates robust and consistent expression over time. Although fluorescence  
187 lifetime is largely insensitive to sensor expression levels, the variable expression seen in surgical  
188 delivery methods can result in differential contribution of autofluorescence, leading to an  
189 apparent sensor expression-dependent lifetime response. Thus, *FL-AK* reporter mice facilitate  
190 chronic imaging for transient PKA activation, comparison of basal PKA phosphorylation over  
191 time, and comparison of pooled results across multiple cells, mice, and experiments. Second, the  
192 mouse line eliminates the need for invasive surgeries like IUE or intracranial viral injection.  
193 Third, although not explored in this study, *FL-AK* mouse line can allow effective targeting of  
194 sparsely distributed or hard-to-transfect cell types such as specific types of microglia and satellite  
195 glia. Fourth, this mouse line simplifies multiplex imaging to study how PKA activity changes in  
196 relation to other critical signaling molecules in cellular processes<sup>58</sup>.

197 Importantly, whereas this study focused on neuronal applications, *FL-AK* reporter mice have the  
198 potential to facilitate understanding the important roles of PKA dynamics in diverse tissues and  
199 body systems. For example, PKA has been studied in the context of immune modulation, cancer  
200 biology, and metabolic disorders such as obesity<sup>27,28,33,59–64</sup>. The delivery of *FLIM-AKAR* via  
201 surgical methods can pose a significant technical barrier to studying PKA dynamics in these  
202 tissues. Crossing *FL-AK* with diverse *Cre* lines will create opportunities to study PKA dynamics  
203 throughout the body and better understand how this signal modulates many critical processes.

## 204 Materials and methods

### 205 Knock-in mice

206 The floxed *FLIM-AKAR* reporter mouse line was generated by the Gene Targeting &  
207 Transgenics Facility at Howard Hughes Medical Institute's Janelia Research Campus. *FLIM-*  
208 *AKAR* was knocked into the *ROSA26* locus, which was demonstrated to produce robust  
209 expression of inserted transgenes<sup>65,66</sup>. *CAG* promoter and the woodchuck hepatitis virus  
210 posttranscriptional regulatory element (WPRE) were used for robust and ubiquitous expression.  
211 A *lox-stop-lox* (LSL) cassette was included between the *CAG* promoter and the *FLIM-AKAR*  
212 open reading frame to produce *Cre* dependence. The *FLIM-AKAR* insert was cloned into a  
213 *ROSA26*-pCAG-loxp-STOP-PGKNeo-loxp-WPRE targeting vector<sup>67</sup> between the second *loxp*

214 and the *WPRE* sequences, where PGKNeo stands for polyphoglycerate kinase I promoter driving  
215 the neomycin phosphotransferase gene (PGK-Neo).

216 Aggregation method, where 8-10 embryonic stem cells were co-cultured with an 8-cell CD1  
217 embryo, was used to produce chimeric mice.

218 Chimeric males were bred with CD1 female mice, and the female pups were crossed with the  
219 chimeric father to achieve a large number of pups for the homozygosity test to check for correct  
220 targeting. Genotyping of the floxed-FLIM-AKAR mice was performed by polymerase chain  
221 reaction (PCR) using the following primers:

222 R26 wt gt Forward: CCAAAGTCGCTCTGAGTTGT

223 R26 wt gt Rorward: CCAGGTTAGCCTTTAAGCCT

224 CMV scr Reverse: CGGGCCATTTACCGTAAGTT

225 PCR amplifies a fragment of 250bp of the endogenous *Rosa26* locus in wild type mice, and a  
226 fragment of 329bp between the *Rosa26* locus and the insert for floxed FLIM-AKAR mice.

227 The sperms of a correctly targeted F1 males were harvested, and *in vitro* fertilization of C57BL/6  
228 females was performed by the Washington University Mouse Genetics Core. The progeny was  
229 bred with C57BL/6 mice for multiple generations to achieve strain stability and bred to  
230 homozygosity. The mice used in this manuscript were produced after 3 to 10 generations of  
231 breeding in a C57BL/6 background.

## 232 **Animals**

233 All aspects of mouse husbandry and surgery were performed following protocols approved by  
234 Washington University Institutional Animal Care and Use Committee and in accordance with  
235 National Institutes of Health guidelines. The experiments were performed according to the  
236 ARRIVE guidelines<sup>68</sup>. *FLIM-AKAR<sup>flox/flox</sup>* mice were crossed with *Emx1<sup>IRESCre</sup>* (Jax: 005628)<sup>51</sup> or  
237 *Tg(Drd1a-Cre)* (EY217Gsat; MGI: 4366803)<sup>48-50</sup>. For experiments examining expression over  
238 time, *Emx1<sup>IRESCre</sup>; FLIM-AKAR<sup>flox/flox</sup>* mice were used (10 total mice: 8 females, 2 males; aged  
239 p21-p94). For experiments testing functional responses in acute brain slices, *Emx1<sup>IRESCre</sup>; FLIM-*  
240 *AKAR<sup>flox/flox</sup>* were used to observe the response to muscarine (mus) in the hippocampus (4 total  
241 mice: 1 male, 3 females; aged p16-p19), and *Tg(Drd1a-Cre); FLIM-AKAR<sup>flox/flox</sup>* mice were used  
242 to observe the response to SKF 81297 in the dorsal striatum (6 total mice: 3 males, 3 females,  
243 aged p33-p43). For *in vivo* studies, *Tg(Drd1-Cre); FLIM-AKAR<sup>flox/flox</sup>* mice were used (1 mouse,  
244 female, aged 42 weeks).

## 245 **Implantation of Optical fibers**

246 For FLiP experiments, an optical fiber (Doric Lenses, MFC\_200/245-  
247 0.37\_4.5mm\_MF1.25\_FLT) was implanted as described previously<sup>69</sup>. Here, the dorsal striatum  
248 was targeted using stereotaxic coordinates of 1.1 mm anterior and 1.7 mm lateral from Bregma  
249 and 2.5 mm ventral from the pia. Four stainless steel screws were secured in the skull to better  
250 anchor the dental cement.

## 251 **Acute Brain Slice Preparation**

252 Acute brain slices were prepared as described previously<sup>39</sup>. For experiments involving *Tg(Drd1-*  
253 *Cre); FLIM-AKAR<sup>fllox/fllox</sup>* mice, intracardial perfusion was performed with ACSF (final  
254 concentrations in mM: 127 NaCl, 25 NaHCO<sub>3</sub>, 1.25 NaH<sub>2</sub>PO<sub>4</sub>, 2.5 KCl, 1 MgCl<sub>2</sub>, 25 glucose)  
255 and slicing was performed in a cold choline-based cutting solution (final concentrations in mM:  
256 25 NaHCO<sub>3</sub>, 1.25 NaH<sub>2</sub>PO<sub>4</sub>, 2.5 KCl, 7 MgCl<sub>2</sub>, 25 glucose, 0.5 CaCl<sub>2</sub>, 110 choline chloride, 11.6  
257 ascorbic acid, 3.1 pyruvic acid) before slices were allowed to recover in ACSF at 34°C for 10  
258 minutes. For experiments involving *Emx1<sup>IRES-Cre/IRES-Cre</sup>; FLIM-AKAR<sup>fllox/fllox</sup>* mice, no intracardial  
259 perfusion was performed. Slicing was done in a cold sucrose-based solution (final concentrations  
260 in mM: 87 NaCl, 25 NaHCO<sub>3</sub>, 1.25 NaH<sub>2</sub>PO<sub>4</sub>, 2.5KCl, 75 sucrose, 25 glucose, 7.5 MgCl<sub>2</sub>)  
261 before the cells were allowed to recover in ACSF at 34°C for 10 minutes.

## 262 Two-Photon Fluorescence Lifetime Imaging Microscopy (2pFLIM) and Image Analysis

263 2pFLIM was performed as previously described<sup>69</sup> except for the following. 920 nm excitation  
264 wavelength was used to image FLIM-AKAR. For the calculation of lifetime, first, a double  
265 exponential curve was fitted to the lifetime histogram for the entire fields-of-view,

$$266 \quad F(t) = F_0(P_{free}e^{-\frac{t}{\tau_{free}-\tau_{offset}}} + P_{FRET}e^{-\frac{t}{\tau_{FRET}-\tau_{offset}}}) * IRF \quad (\text{Equation 1})$$

267 where  $F(t)$  is the photon count at lifetime  $t$ ,  $F_0$  is the peak photon count,  $\tau_{free}$  and  $\tau_{FRET}$  are  
268 fluorescence lifetimes of donors that are free and that have undergone FRET respectively and are  
269 2.14 ns and 0.69 ns for FLIM-AKAR.  $P_{free}$  and  $P_{FRET}$  are the corresponding fractions of these two  
270 species,  $\tau_{offset}$  is the offset arrival time, and IRF is the measured instrument response function.  
271 Then, average lifetime for a given region of interest (ROI) was calculated from 0.0489 ns to 11.5  
272 ns with the following calculation:

$$273 \quad \tau = \frac{\sum(F(t)*t)}{\sum F(t)} - \tau_{offset} \quad (\text{Equation 2})$$

274 Where  $F(t)$  is the photon count at a given time channel, and  $t$  is the lifetime measurement at that  
275 time channel. Intensity measurement was represented by the photon count/pixel of a given ROI.

276 Change of fluorescence lifetime per cell at baseline was quantified as the absolute value of the  
277 difference between the average of the first three lifetime values of the baseline epoch and the  
278 minimum lifetime value of the baseline epoch. Change in lifetime due to drug treatment was  
279 quantified as the absolute value of the difference between the average of the last three lifetime  
280 values of the baseline epoch and the minimum lifetime value of the corresponding treatment  
281 epoch.

282 For Figure 2, all the data were collected at an imaging power of 2.5 mW and between 20-35 $\mu$ m  
283 from the surface of the slice.

## 284 Fluorescence Lifetime Photometry (FLiP) and Analysis

285 A FLiP setup was built and used as previously described<sup>57,69</sup> except for the following.  
286 Fluorescence lifetime and intensity data were collected at 1Hz using our custom FLiP setup and  
287 acquisition software<sup>57,69,70</sup>. We calculated lifetime at each timepoint by first fitting a double  
288 exponential curve to the fluorescent lifetime histogram using a Gaussian IRF (Equation 1). Then,  
289 the average lifetime of the fitted curve (to infinity) was calculated.



290 Data were aligned to injection timepoints using synchronized video recordings through Bonsai  
291 (<https://bonsai-rx.org/>). Location of fiber implant was subsequently assessed with histology. Data  
292 analysis was performed using MATLAB.

### 293 ***In vivo* SKF81297 Response Experiments**

294 Mice with an optical fiber implant were connected to a patch cord (Doric Lenses,  
295 MFP\_200/220/900-0.37\_1.5m\_FCM-MF1.25\_LAF) and placed in a round chamber to which  
296 they had been habituated previously. A camera was oriented to capture the entire recording  
297 chamber to assess behavior and capture injection time. Each trial consisted of 1 hour of  
298 continuous data collection with a saline injection (0.9% NaCl; 0.1 mL/10g body weight; IP  
299 delivery) at 5 minutes and an SKF 81297 injection (10 mg/kg) at 10 minutes.

300 Video recording was initiated in Bonsai at the start of FLiP recording using a transistor-transistor  
301 logic (TTL) pulse generated by Matlab through an Arduino Due board (Arduino, A000062) to  
302 ensure synchronized data collection. Video was collected at 25 frames per second.

### 303 ***In vitro* Pharmacology**

304 For acute slicing experiments, drugs were applied via bath perfusion as previously described<sup>69</sup>.  
305 Final concentrations are indicated in parentheses: (+)-muscarine-iodide (10  $\mu$ M) and SKF 81297  
306 hydrobromide (1  $\mu$ M) were obtained from Tocris. FSK (50  $\mu$ M) was obtained from either Tocris  
307 or Cayman Chemicals.

### 308 **Quantification and Statistical Analyses**

309 Detailed description of quantification and statistics are summarized in figure legends, figures,  
310 and results. Briefly, Mann-Whitney U test was used for unpaired data, Wilcoxon signed-rank test  
311 was used for paired data. Nonparametric tests were used so that we did not have to make any  
312 assumption of distribution. All tests were two-tailed with an alpha level of 0.05.

### 313 **Histology**

314 For imaging of fixed whole-brain slices, both *Emx1*<sup>IRES-Cre/IRES-Cre</sup>; *FLIM-AKAR*<sup>flx/flx</sup> and *Cre*<sup>-/-</sup>  
315 ; *FLIM-AKAR*<sup>flx/flx</sup> mice were used. Transcardiac perfusion was performed first with 1X  
316 Phosphate-Buffered Saline (PBS) and then with 4% paraformaldehyde (PFA) in PBS for tissue  
317 fixation<sup>71</sup>. Brains were placed in 4% PFA overnight before being switched to 1X PBS. 50  $\mu$ m  
318 coronal sections were obtained with a vibratome (Leica Instruments, VT1000S). Sections were  
319 mounted on glass slides with mounting media containing DAPI stain. Images were obtained with  
320 a Zeiss Axioscan 7 using Zen Slidescan software. 475nm light was used for excitation. Images  
321 were acquired under both 5x and 10x objectives. Higher resolution images were subsequently  
322 stitched together.

### 323 **Data Availability:**

324 All data required to evaluate the conclusion are included in the Figures and text. All data will be  
325 freely available upon request for non-commercial purposes. The *FL-AK* mice will be available at  
326 the Jackson Laboratory Repository.

### 327 **References**

- 328 1. Purvis, J. E. & Lahav, G. Encoding and Decoding Cellular Information through Signaling  
329 Dynamics. *Cell* **152**, 945–956; 10.1016/j.cell.2013.02.005 (2013).
- 330 2. Marshall, C. J. Specificity of receptor tyrosine kinase signaling: Transient versus sustained  
331 extracellular signal-regulated kinase activation. *Cell* **80**, 179–185; 10.1016/0092-  
332 8674(95)90401-8 (1995).
- 333 3. Gotoh, Y. *et al.* Microtubule-associated-protein (MAP) kinase activated by nerve growth  
334 factor and epidermal growth factor in PC12 cells. *Eur. J. Biochem.* **193**, 661–669;  
335 10.1111/j.1432-1033.1990.tb19384.x (1990).
- 336 4. Nguyen, T. T. *et al.* Co-regulation of the mitogen-activated protein kinase, extracellular  
337 signal-regulated kinase 1, and the 90-kDa ribosomal S6 kinase in PC12 cells. Distinct effects  
338 of the neurotrophic factor, nerve growth factor, and the mitogenic factor, epidermal growth  
339 factor. *J. Biol. Chem.* **268**, 9803–9810; 10.1016/S0021-9258(18)98418-8 (1993).
- 340 5. Traverse, S., Gomez, N., Paterson, H., Marshall, C. & Cohen, P. Sustained activation of the  
341 mitogen-activated protein (MAP) kinase cascade may be required for differentiation of PC12  
342 cells. Comparison of the effects of nerve growth factor and epidermal growth factor.  
343 *Biochem. J.* **288**, 351–355; 10.1042/bj2880351 (1992).
- 344 6. Batchelor, E., Mock, C. S., Bhan, I., Loewer, A. & Lahav, G. Recurrent Initiation: A  
345 Mechanism for Triggering p53 Pulses in Response to DNA Damage. *Mol. Cell* **30**, 277–289;  
346 10.1016/j.molcel.2008.03.016 (2008).
- 347 7. Purvis, J. E. *et al.* p53 Dynamics Control Cell Fate. *Science* **336**, 1440–1444;  
348 10.1126/science.1218351 (2012).
- 349 8. Lahav, G. *et al.* Dynamics of the p53-Mdm2 feedback loop in individual cells. *Nat. Genet.*  
350 **36**, 147–150; 10.1038/ng1293 (2004).
- 351 9. Gilman, A. G. Nobel Lecture. G proteins and regulation of adenylyl cyclase. *Biosci. Rep.* **15**,  
352 65–97; 10.1007/BF01200143 (1995).
- 353 10. Chen, Y. *et al.* Endogenous Gαq-Coupled Neuromodulator Receptors Activate Protein  
354 Kinase A. *Neuron* **96**, 1070-1083.e5; 10.1016/j.neuron.2017.10.023 (2017).
- 355 11. Greengard, P. The Neurobiology of Slow Synaptic Transmission. *Science* **294**, 1024–1030;  
356 10.1126/science.294.5544.1024 (2001).
- 357 12. Overhoff, M. *et al.* Autophagy regulates neuronal excitability by controlling cAMP/protein  
358 kinase A signaling at the synapse. *EMBO J.* **41**, e110963; 10.15252/embj.2022110963  
359 (2022).
- 360 13. Lee, S. J. *et al.* Cell-type-specific asynchronous modulation of PKA by dopamine in  
361 learning. *Nature* **590**, 451–456; 10.1038/s41586-020-03050-5 (2021).
- 362 14. Kwon, H.-B. & Sabatini, B. L. Glutamate induces de novo growth of functional spines in  
363 developing cortex. *Nature* **474**, 100–104; 10.1038/nature09986 (2011).
- 364 15. Drain, P., Folkers, E. & Quinn, W. G. cAMP-dependent protein kinase and the disruption of  
365 learning in transgenic flies. *Neuron* **6**, 71–82; 10.1016/0896-6273(91)90123-H (1991).
- 366 16. Higley, M. J. & Sabatini, B. L. Competitive regulation of synaptic Ca influx by D2 dopamine  
367 and A2A adenosine receptors. *Nat. Neurosci.* **13**, 958–966; 10.1038/nn.2592 (2010).

- 368 17. Kandel, E. & Abel, T. Neuropeptides, Adenylyl Cyclase, and Memory Storage. *Science* **268**,  
369 825–826; 10.1126/science.7754367 (1995).
- 370 18. Shen, W., Flajolet, M., Greengard, P. & Surmeier, D. J. Dichotomous Dopaminergic Control  
371 of Striatal Synaptic Plasticity. *Science* **321**, 848–851; 10.1126/science.1160575 (2008).
- 372 19. Seol, G. H. *et al.* Neuromodulators Control the Polarity of Spike-Timing-Dependent  
373 Synaptic Plasticity. *Neuron* **55**, 919–929; 10.1016/j.neuron.2007.08.013 (2007).
- 374 20. Skeberdis, V. A. *et al.* Protein kinase A regulates calcium permeability of NMDA receptors.  
375 *Nat. Neurosci.* **9**, 501–510; 10.1038/nn1664 (2006).
- 376 21. Skoulakis, E. M. C., Kalderon, D. & Davis, R. L. Preferential expression in mushroom  
377 bodies of the catalytic subunit of protein kinase A and its role in learning and memory.  
378 *Neuron* **11**, 197–208; 10.1016/0896-6273(93)90178-T (1993).
- 379 22. Williams, J. T., Christie, M. J. & Manzoni, O. Cellular and Synaptic Adaptations Mediating  
380 Opioid Dependence. *Physiol. Rev.* **81**, 299–343; 10.1152/physrev.2001.81.1.299 (2001).
- 381 23. Zhong, H. *et al.* Subcellular Dynamics of Type II PKA in Neurons. *Neuron* **62**, 363–374;  
382 10.1016/j.neuron.2009.03.013 (2009).
- 383 24. Thornquist, S. C., Pitsch, M. J., Auth, C. S. & Crickmore, M. A. Biochemical evidence  
384 accumulates across neurons to drive a network-level eruption. *Mol. Cell* **81**, 675–690.e8;  
385 10.1016/j.molcel.2020.12.029 (2021).
- 386 25. Dunn, T. *et al.* Imaging of cAMP levels and PKA activity reveals that retinal waves drive  
387 oscillations in second messenger cascades. *J. Neurosci. Off. J. Soc. Neurosci.* **26**, 12807;  
388 10.1523/JNEUROSCI.3238-06.2006 (2006).
- 389 26. Lutas, A., Fernando, K., Zhang, S. X., Sambangi, A. & Andermann, M. L. History-  
390 dependent dopamine release increases cAMP levels in most basal amygdala glutamatergic  
391 neurons to control learning. *Cell Rep.* **38**, 110297; 10.1016/j.celrep.2022.110297 (2022).
- 392 27. Zhang, J. Z. *et al.* Phase Separation of a PKA Regulatory Subunit Controls cAMP  
393 Compartmentation and Oncogenic Signaling. *Cell* **182**, 1531–1544.e15;  
394 10.1016/j.cell.2020.07.043 (2020).
- 395 28. Pattabiraman, D. R. *et al.* Activation of PKA leads to mesenchymal-to-epithelial transition  
396 and loss of tumor-initiating ability. *Science* **351**, aad3680; 10.1126/science.aad3680 (2016).
- 397 29. Brandon, E. P., Idzerda, R. L. & McKnight, G. S. PKA isoforms, neural pathways, and  
398 behaviour: making the connection. *Curr. Opin. Neurobiol.* **7**, 397–403; 10.1016/s0959-  
399 4388(97)80069-4 (1997).
- 400 30. Diviani, D., Reggi, E., Arambasic, M., Caso, S. & Maric, D. Emerging roles of A-kinase  
401 anchoring proteins in cardiovascular pathophysiology. *Biochim. Biophys. Acta* **1863**, 1926–  
402 1936; 10.1016/j.bbamcr.2015.11.024 (2016).
- 403 31. Cheng, C.-W. *et al.* Fasting-Mimicking Diet Promotes Ngn3-Driven  $\beta$ -Cell Regeneration to  
404 Reverse Diabetes. *Cell* **168**, 775–788.e12; 10.1016/j.cell.2017.01.040 (2017).
- 405 32. Zhang, J., Hupfeld, C. J., Taylor, S. S., Olefsky, J. M. & Tsien, R. Y. Insulin disrupts beta-  
406 adrenergic signalling to protein kinase A in adipocytes. *Nature* **437**, 569–573;  
407 10.1038/nature04140 (2005).

- 408 33. Krebs, E. G. Protein kinases. *Curr. Top. Cell. Regul.* **5**, 99–133; (1972).
- 409 34. Lur, G. & Higley, M. J. Glutamate Receptor Modulation Is Restricted to Synaptic  
410 Microdomains. *Cell Rep.* **12**, 326–334; 10.1016/j.celrep.2015.06.029 (2015).
- 411 35. Zhang, S. X. *et al.* Hypothalamic dopamine neurons motivate mating through persistent  
412 cAMP signalling. *Nature* **597**, 245–249; 10.1038/s41586-021-03845-0 (2021).
- 413 36. Zhang, J., Ma, Y., Taylor, S. S. & Tsien, R. Y. Genetically encoded reporters of protein  
414 kinase A activity reveal impact of substrate tethering. *Proc. Natl. Acad. Sci. U. S. A.* **98**,  
415 14997–15002; 10.1073/pnas.211566798 (2001).
- 416 37. Zhang, J.-F. *et al.* An ultrasensitive biosensor for high-resolution kinase activity imaging in  
417 awake mice. *Nat. Chem. Biol.* **17**, 39–46; 10.1038/s41589-020-00660-y (2021).
- 418 38. Tang, S. & Yasuda, R. Imaging ERK and PKA Activation in Single Dendritic Spines during  
419 Structural Plasticity. *Neuron* **93**, 1315–1324.e3; 10.1016/j.neuron.2017.02.032 (2017).
- 420 39. Chen, Y., Saulnier, J., Yellen, G. & Sabatini, B. A PKA activity sensor for quantitative  
421 analysis of endogenous GPCR signaling via 2-photon FRET-FLIM imaging. *Front.*  
422 *Pharmacol.* **5**, (2014).
- 423 40. Ma, L. *et al.* A Highly Sensitive A-Kinase Activity Reporter for Imaging Neuromodulatory  
424 Events in Awake Mice. *Neuron* **99**, 665–679.e5; 10.1016/j.neuron.2018.07.020 (2018).
- 425 41. Allen, M. D. & Zhang, J. Subcellular dynamics of protein kinase A activity visualized by  
426 FRET-based reporters. *Biochem. Biophys. Res. Commun.* **348**, 716–721;  
427 10.1016/j.bbrc.2006.07.136 (2006).
- 428 42. Ma, L. *et al.* Locomotion activates PKA through dopamine and adenosine in striatal neurons.  
429 *Nature* **611**, 762–768; 10.1038/s41586-022-05407-4 (2022).
- 430 43. Yasuda, R. Imaging spatiotemporal dynamics of neuronal signaling using fluorescence  
431 resonance energy transfer and fluorescence lifetime imaging microscopy. *Curr. Opin.*  
432 *Neurobiol.* **16**, 551–561; 10.1016/j.conb.2006.08.012 (2006).
- 433 44. Bastiaens, P. I. H. & Squire, A. Fluorescence lifetime imaging microscopy: spatial resolution  
434 of biochemical processes in the cell. *Trends Cell Biol.* **9**, 48–52; 10.1016/S0962-  
435 8924(98)01410-X (1999).
- 436 45. Zariwala, H. A. *et al.* A Cre-Dependent GCaMP3 Reporter Mouse for Neuronal Imaging In  
437 Vivo. *J. Neurosci.* **32**, 3131–3141; 10.1523/JNEUROSCI.4469-11.2012 (2012).
- 438 46. Dana, H. *et al.* Thy1-GCaMP6 Transgenic Mice for Neuronal Population Imaging In Vivo.  
439 *PLOS ONE* **9**, e108697; 10.1371/journal.pone.0108697 (2014).
- 440 47. Chen, Q. *et al.* Imaging Neural Activity Using Thy1-GCaMP Transgenic Mice. *Neuron* **76**,  
441 297–308; 10.1016/j.neuron.2012.07.011 (2012).
- 442 48. Gong, S. *et al.* Targeting Cre recombinase to specific neuron populations with bacterial  
443 artificial chromosome constructs. *J. Neurosci. Off. J. Soc. Neurosci.* **27**, 9817–9823;  
444 10.1523/JNEUROSCI.2707-07.2007 (2007).
- 445 49. Heintz, N. Gene expression nervous system atlas (GENSAT). *Nat. Neurosci.* **7**, 483;  
446 10.1038/nn0504-483 (2004).

- 447 50. Gerfen, C. R., Paletzki, R. & Heintz, N. GENSAT BAC Cre-recombinase driver lines to  
448 study the functional organization of cerebral cortical and basal ganglia circuits. *Neuron* **80**,  
449 10.1016/j.neuron.2013.10.016; 10.1016/j.neuron.2013.10.016 (2013).
- 450 51. Gorski, J. A. *et al.* Cortical Excitatory Neurons and Glia, But Not GABAergic Neurons, Are  
451 Produced in the Emx1-Expressing Lineage. *J. Neurosci.* **22**, 6309–6314;  
452 10.1523/JNEUROSCI.22-15-06309.2002 (2002).
- 453 52. Taylor, S. S., Knighton, D. R., Zheng, J., Ten Eyck, L. F. & Sowadski, J. M. Structural  
454 Framework for the Protein Kinase Family. *Annu. Rev. Cell Biol.* **8**, 429–462;  
455 10.1146/annurev.cb.08.110192.002241 (1992).
- 456 53. Gilman, A. G. G proteins: transducers of receptor-generated signals. *Annu. Rev. Biochem.*  
457 **56**, 615–649; 10.1146/annurev.bi.56.070187.003151 (1987).
- 458 54. Beaulieu, J.-M. & Gainetdinov, R. R. The Physiology, Signaling, and Pharmacology of  
459 Dopamine Receptors. *Pharmacol. Rev.* **63**, 182–217; 10.1124/pr.110.002642 (2011).
- 460 55. Jones-Tabah, J., Mohammad, H., Paulus, E. G., Clarke, P. B. S. & Hébert, T. E. The  
461 Signaling and Pharmacology of the Dopamine D1 Receptor. *Front. Cell. Neurosci.* **15**,  
462 (2022).
- 463 56. Missale, C., Nash, S. R., Robinson, S. W., Jaber, M. & Caron, M. G. Dopamine Receptors:  
464 From Structure to Function. *Physiol. Rev.* **78**, 189–225; 10.1152/physrev.1998.78.1.189  
465 (1998).
- 466 57. Lee, S. J., Chen, Y., Lodder, B. & Sabatini, B. L. Monitoring Behaviorally Induced  
467 Biochemical Changes Using Fluorescence Lifetime Photometry. *Front. Neurosci.* **13**, (2019).
- 468 58. Farrants, H. *et al.* A modular chemigenetic calcium indicator enables in vivo functional  
469 imaging with near-infrared light. 2023.07.18.549527; Preprint at  
470 <https://doi.org/10.1101/2023.07.18.549527> 10.1101/2023.07.18.549527 (2023).
- 471 59. London, E. & Stratakis, C. A. The regulation of PKA signaling in obesity and in the  
472 maintenance of metabolic health. *Pharmacol. Ther.* **237**, 108113;  
473 10.1016/j.pharmthera.2022.108113 (2022).
- 474 60. Torgersen, K. M., Vang, T., Abrahamsen, H., Yaqub, S. & Taskén, K. Molecular  
475 mechanisms for protein kinase A-mediated modulation of immune function. *Cell. Signal.* **14**,  
476 1–9; 10.1016/s0898-6568(01)00214-5 (2002).
- 477 61. Zhang, H., Kong, Q., Wang, J., Jiang, Y. & Hua, H. Complex roles of cAMP–PKA–CREB  
478 signaling in cancer. *Exp. Hematol. Oncol.* **9**, 32; 10.1186/s40164-020-00191-1 (2020).
- 479 62. Sarwar, M., Sandberg, S., Abrahamsson, P.-A. & Persson, J. L. Protein kinase A (PKA)  
480 pathway is functionally linked to androgen receptor (AR) in the progression of prostate  
481 cancer. *Urol. Oncol. Semin. Orig. Investig.* **32**, 25.e1-25.e12; 10.1016/j.urolonc.2012.08.019  
482 (2014).
- 483 63. Hedrick, E. D. *et al.* Differential PKA activation and AKAP association determines cell fate  
484 in cancer cells. *J. Mol. Signal.* **8**, 10; 10.1186/1750-2187-8-10 (2013).
- 485 64. Wehbi, V. L. & Taskén, K. Molecular Mechanisms for cAMP-Mediated Immunoregulation  
486 in T cells – Role of Anchored Protein Kinase A Signaling Units. *Front. Immunol.* **7**, (2016).

- 487 65. Soriano, P. Generalized lacZ expression with the ROSA26 Cre reporter strain. *Nat. Genet.*  
488 **21**, 70–71; 10.1038/5007 (1999).
- 489 66. Zambrowicz, B. P. *et al.* Disruption of overlapping transcripts in the ROSA  $\beta$ geo 26 gene  
490 trap strain leads to widespread expression of  $\beta$ -galactosidase in mouse embryos  
491 and hematopoietic cells. *Proc. Natl. Acad. Sci.* **94**, 3789–3794; 10.1073/pnas.94.8.3789  
492 (1997).
- 493 67. Madisen, L. *et al.* A robust and high-throughput Cre reporting and characterization system  
494 for the whole mouse brain. *Nat. Neurosci.* **13**, 133–140; 10.1038/nn.2467 (2010).
- 495 68. Kilkenny, C., Browne, W. J., Cuthill, I. C., Emerson, M. & Altman, D. G. Improving  
496 Bioscience Research Reporting: The ARRIVE Guidelines for Reporting Animal Research.  
497 *PLOS Biol.* **8**, e1000412; 10.1371/journal.pbio.1000412 (2010).
- 498 69. Ma, P. *et al.* Fluorescence lifetime enables high-resolution analysis of neuromodulator  
499 dynamics across time and animals. 2022.09.28.510014; Preprint at  
500 <https://doi.org/10.1101/2022.09.28.510014> 10.1101/2022.09.28.510014 (2023).
- 501 70. Pologruto, T. A., Sabatini, B. L. & Svoboda, K. ScanImage: Flexible software for operating  
502 laser scanning microscopes. *Biomed. Eng. OnLine* **2**, 13; 10.1186/1475-925X-2-13 (2003).
- 503 71. Wu, J. *et al.* Transcardiac Perfusion of the Mouse for Brain Tissue Dissection and Fixation.  
504 *Bio-Protoc.* **11**, e3988; 10.21769/BioProtoc.3988 (2021).

505

#### 506 **Author Contributions:**

507 YC and BS conceived and designed the construction of the reporter mouse. ET, AM, and YC  
508 designed the characterization experiments. ET, AM, AO, and YC conducted experiments. ET,  
509 AM, and AO performed data analysis. ET and YC wrote the manuscript. All authors reviewed  
510 the manuscript.

#### 511 **Additional Information:**

512 The authors declare no competing interests.

#### 513 **Acknowledgments:**

514 We thank Caiying Guo, Mia Wallace, and members of Yao Chen’s lab for helpful feedback on  
515 the project. We thank Kerry Grens for critical comments on the manuscript. This work was  
516 supported by grants from the U.S. National Institute of Neurological Disorders and Stroke (R01  
517 NS119821, to YC), the Whitehall Foundation (2019-08-64, to YC), and the U.S. National  
518 Institute of Aging (F30 AG084271, to ET). We thank Charles Gerfen and Nathaniel Heintz for  
519 the *Tg(Drd1a-Cre)* (EY217Gsat) mouse line. The floxed *FLIM-AKAR* reporter mouse line was  
520 generated by the Gene Targeting & Transgenics Facility at Howard Hughes Medical Institute’s  
521 Janelia Research Campus. In vitro fertilization was performed by the Mouse Genetics Core at  
522 Washington University School of Medicine. Data collection and analysis from experiments using  
523 the Zeiss Axioscan 7 and Zen Slidescan software were performed in part through the use of  
524 Washington University Center for Cellular Imaging (WUCCI) supported by Washington  
525 University School of Medicine, The Children’s Discovery Institute of Washington University  
526 and St. Louis Children’s Hospital (CDI-CORE-2015-505 and CDI-CORE-2019-813) and the

527 Foundation for Barnes-Jewish Hospital (3770 and 4642). Schematic illustrations from Fig. 1a-b  
528 and 5a were created with BioRender.

## 529 **Figure Legends**

530 **Figure 1.** Expression of FLIM-AKAR across multiple cell types in the *FLIM-AKAR<sup>lox/lox</sup>* mouse.  
531 **(a)** Schematic of the gene targeting strategy to generate the *FLIM-AKAR<sup>lox/lox</sup>* mice. **(b)**  
532 Schematic of how FLIM-AKAR works. FLIM-AKAR detects PKA phosphorylation via the  
533 change of FRET between a donor fluorophore and an acceptor fluorophore. When PKA  
534 phosphorylates the PKA consensus substrate region in the linker, the two fluorophores come  
535 closer together, resulting in increased FRET and decreased fluorescence lifetime. The process  
536 can be reversed by phosphatases. **(c-d)** Images of coronal slices showing FLIM-AKAR  
537 expression in the whole brain (c) and hippocampus (d) in *Emx1<sup>IRESCre</sup>;FLIM-AKAR<sup>lox/lox</sup>* (left) and  
538 *Cre-;FLIM-AKAR<sup>lox/lox</sup>* (right) mice. Images within the same panel have matching imaging  
539 conditions. **(e-f)** 2p fluorescence intensity (e) and lifetime (f) images of D1R-SPNs in the dorsal  
540 striatum (left) and pyramidal neurons in CA1 (right).

541 **Figure 2.** Stable expression of FLIM-AKAR in *FL-AK* reporter mouse over time. **(a-b)** 2p  
542 images of D1R-SPNs of the dorsal striatum in acute brain slices. **(c-d)** Quantification of nuclear  
543 and cytoplasmic photon count from two age ranges (0-6 weeks: n = 14 cells from 4 mice; 6-14  
544 weeks: n = 16 cells from 6 mice). Data are represented as median with 25<sup>th</sup> and 75<sup>th</sup> percentiles  
545 (ns: not significant; p>0.05, 2-tailed Mann-Whitney U test).

546 **Figure 3.** Functional response of D1R-SPNs to D1R activation in acute slices of *Tg(Drd1a-Cre);*  
547 *FLIM-AKAR<sup>lox/lox</sup>* mice. **(a)** Time-lapse heatmaps of 2pFLIM images of an example SPN in acute  
548 slices of the dorsal striatum in response to the D1R agonist SKF 81297 (1  $\mu$ M). Dotted line  
549 indicates the location of nucleus. **(b)** Example trace of fluorescence lifetime response of the  
550 D1R-SPN shown in (a). **(c)** Quantification of change of fluorescence lifetime in response to SKF  
551 81297 in D1R-SPNs (n = 43 cells from 6 mice). Data are represented as median with 25<sup>th</sup> and  
552 75<sup>th</sup> percentiles (\*\*\*: p < 0.001, Wilcoxon signed rank test).

553 **Figure 4.** Functional response of CA1 pyramidal neurons in response to muscarinic  
554 acetylcholine receptor (mAChR) activation and adenylate cyclase activation in acute slices of  
555 *Emx1<sup>IRESCre</sup>; FLIM-AKAR<sup>lox/lox</sup>* mice. **(a)** Time-lapse heatmaps of 2pFLIM images of an example  
556 CA1 pyramidal neuron in an acute hippocampal slice in response to the mAChR agonist  
557 muscarine (mus, 10  $\mu$ M) and adenylate cyclase activator forskolin (FSK, 50  $\mu$ M). Dotted line  
558 indicates the location of nucleus. **(b)** Example trace of fluorescence lifetime response of the  
559 pyramidal neuron shown in (a). **(c)** Quantification of change of fluorescence lifetime in response  
560 to mus and FSK in CA1 pyramidal neurons (n = 32 cells from 4 animals). Data are represented  
561 as median with 25<sup>th</sup> and 75<sup>th</sup> percentiles (\*\*\*: p < 0.001, \*\*: p < 0.01, Wilcoxon signed rank test).

562 **Figure 5.** *In vivo* functional response of D1R-SPNs to D1R activation in *Tg(Drd1a-Cre); FLIM-*  
563 *AKAR<sup>lox/lox</sup>* mice. **(a)** Schematic of experimental setup for fluorescence lifetime photometry  
564 (FLiP). **(b)** Example trace of change in fluorescence lifetime in response to saline followed by  
565 SKF 81297 (10 mg/kg) in D1R-SPNs in the dorsal striatum.

566

Figure 1

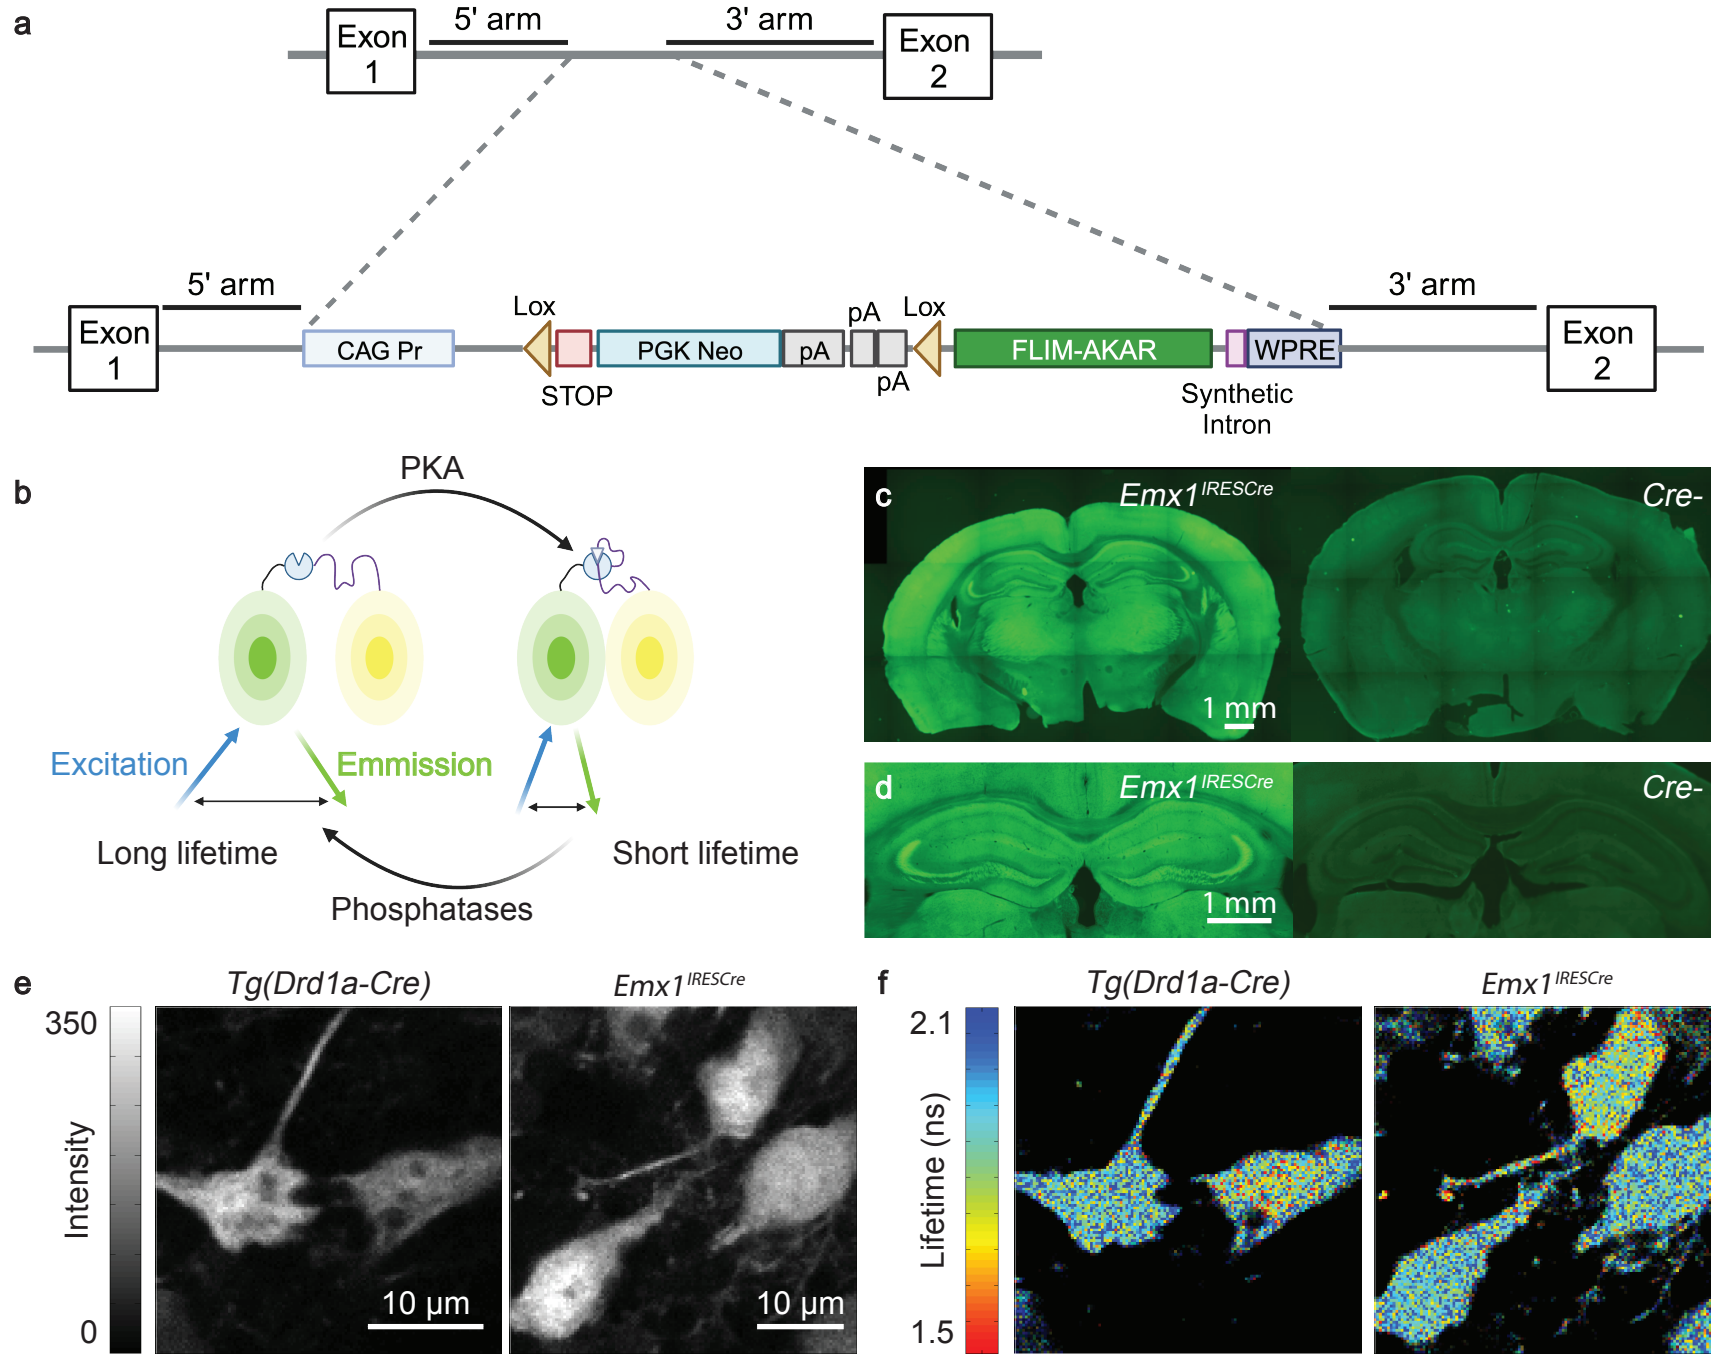



## Figure 2

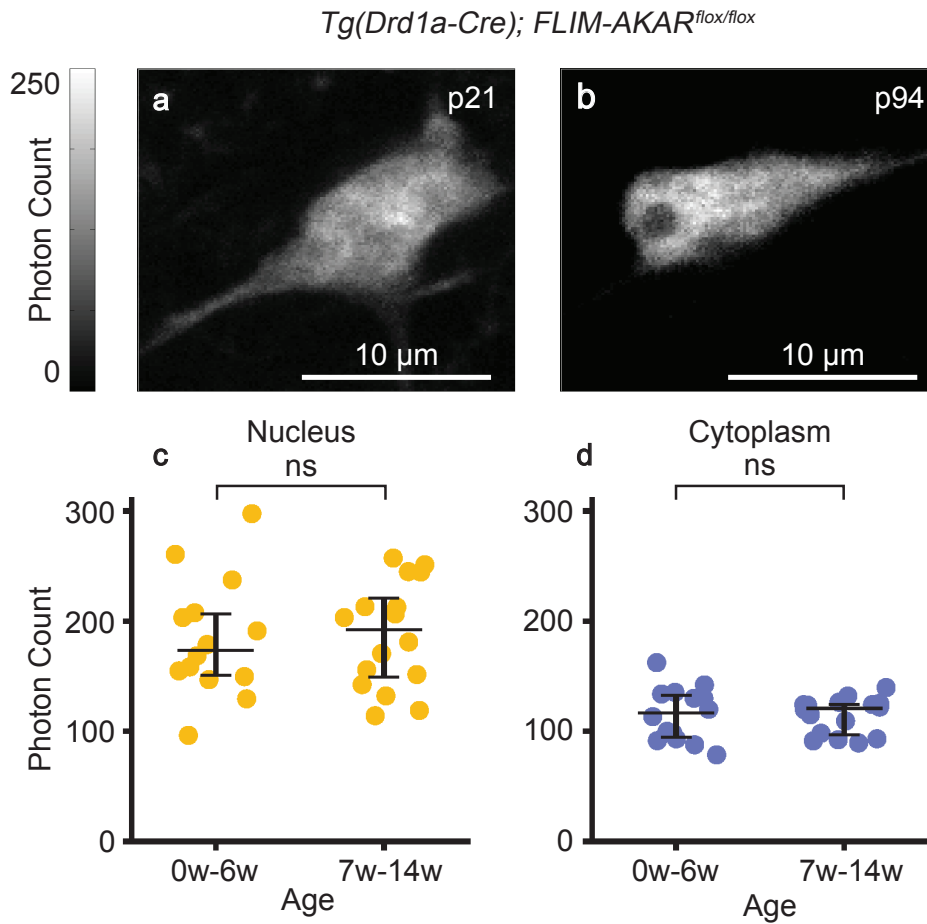

## Figure 3

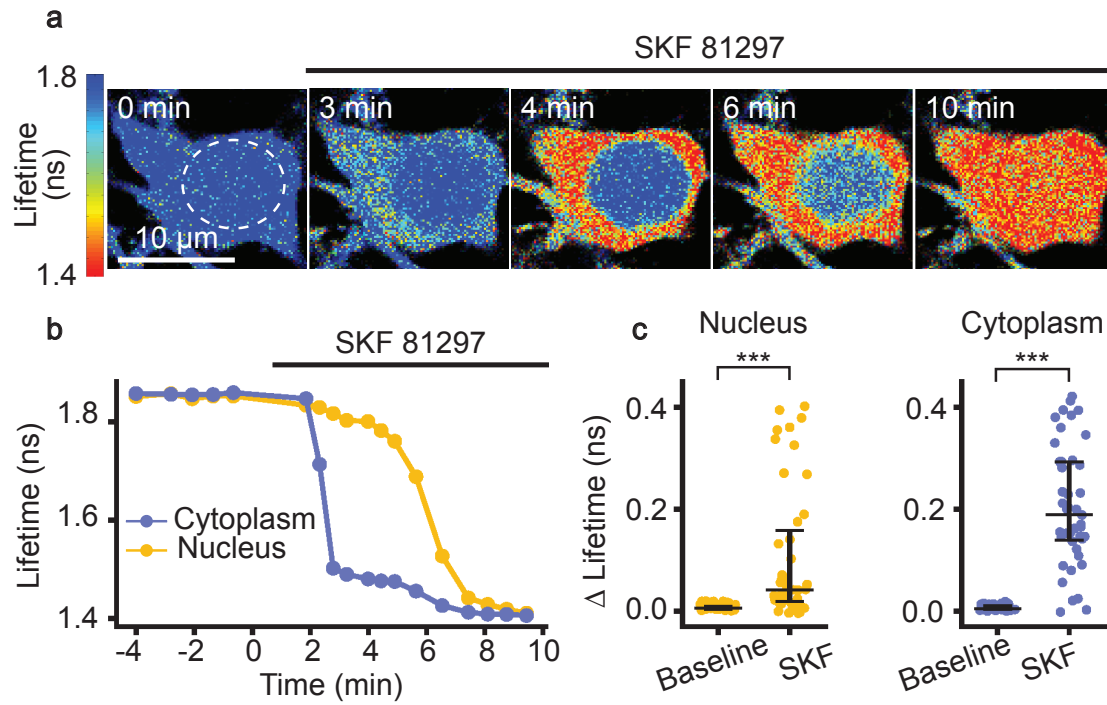

Figure 4

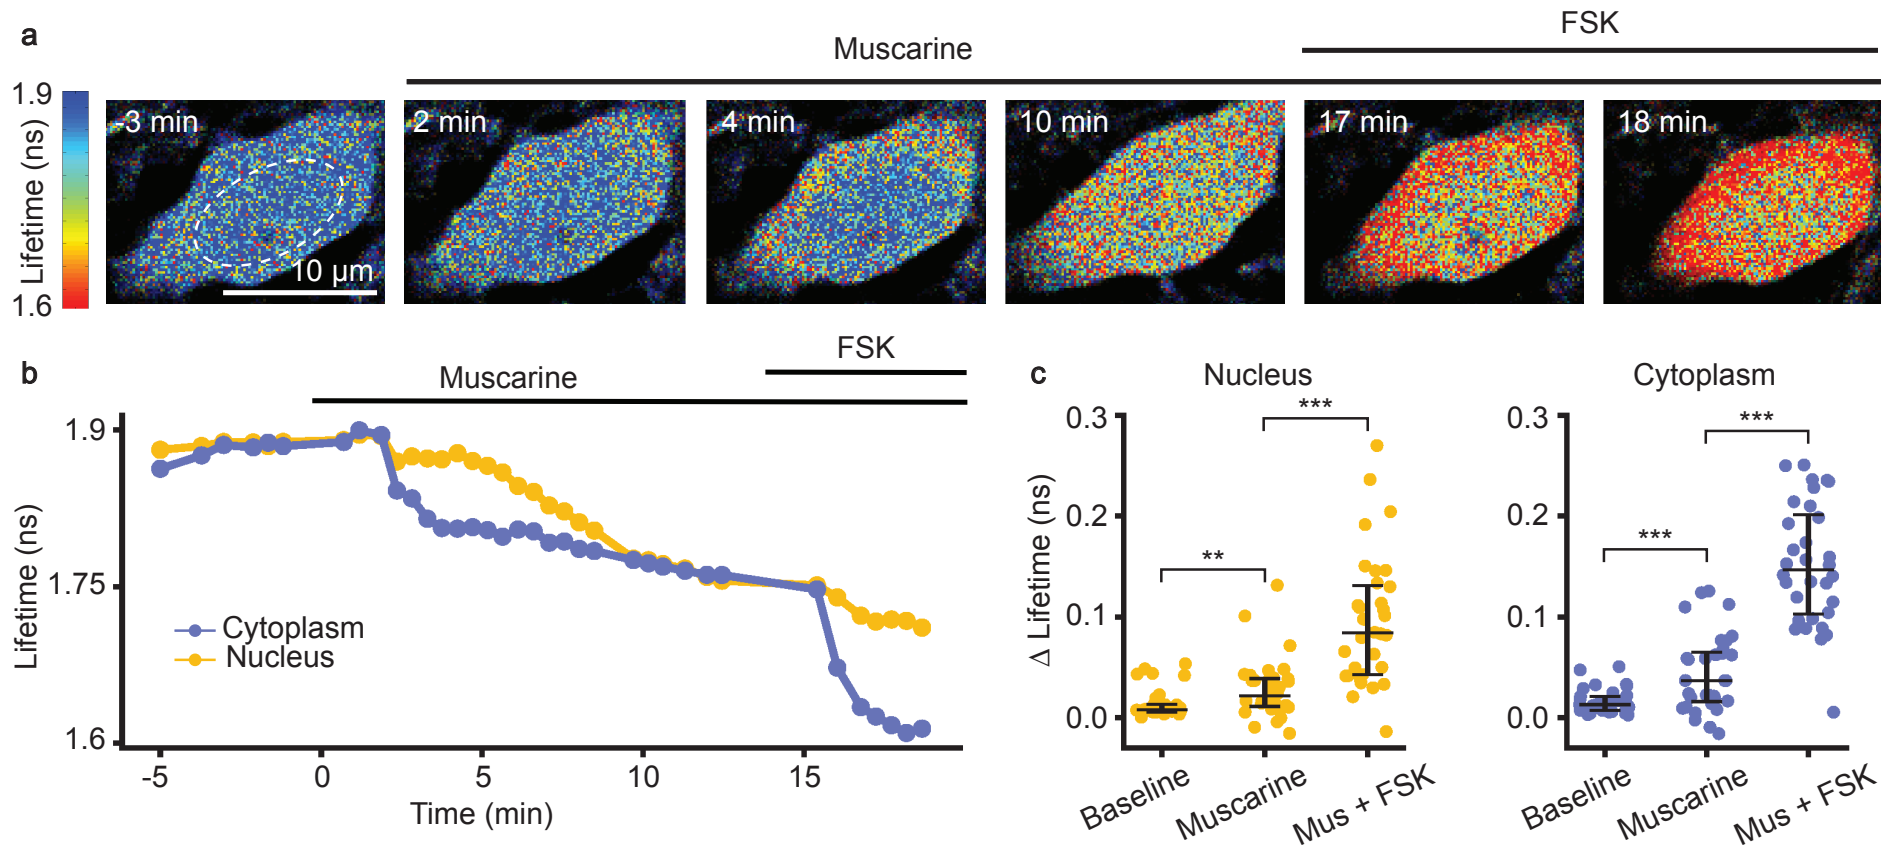

## Figure 5

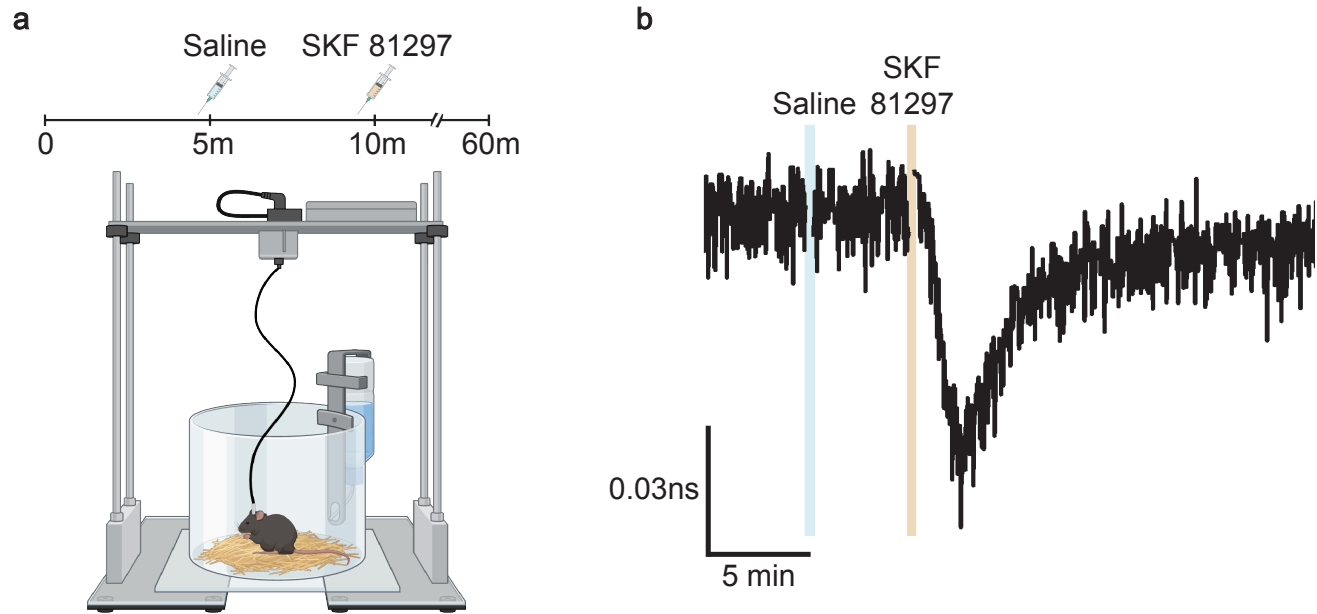

Source: https://www.biorxiv.org/content/10.1101/2023.10.31.565028v1.full.pdf
